# Supplementary material for: CdTe nanoparticles decorated titania for dye sensitized solar cell: a novel co-sensitizer approach towards highly efficient energy conversion
Source: Royal Society of Chemistry journal article supplement (doi:10.1039/c7nj00737j), 2017-01-01
Supplement: c7nj00737j1.pdf [file c7nj00737j1.pdf]

**Electronic Supplementary Information for New Journal Of Chemistry**

**Supplementary Information**

**CdTe nanoparticles decorated titania for dye sensitized solar cell: A novel  
co-sensitizer approach towards highly efficient energy conversion**

Sayantani Bhattacharya and Jayati Datta<sup>\*</sup>

Department of Chemistry, Indian Institute of Engineering Science and  
Technology, Shibpur, Howrah - 711 103, Bengal, India

Email - [jayati\\_datta@rediffmail.com](mailto:jayati_datta@rediffmail.com)

\*correspondence to: Tel.: +91 33 2668 4561–4563x514; Fax: +91 33  
2668 2916.

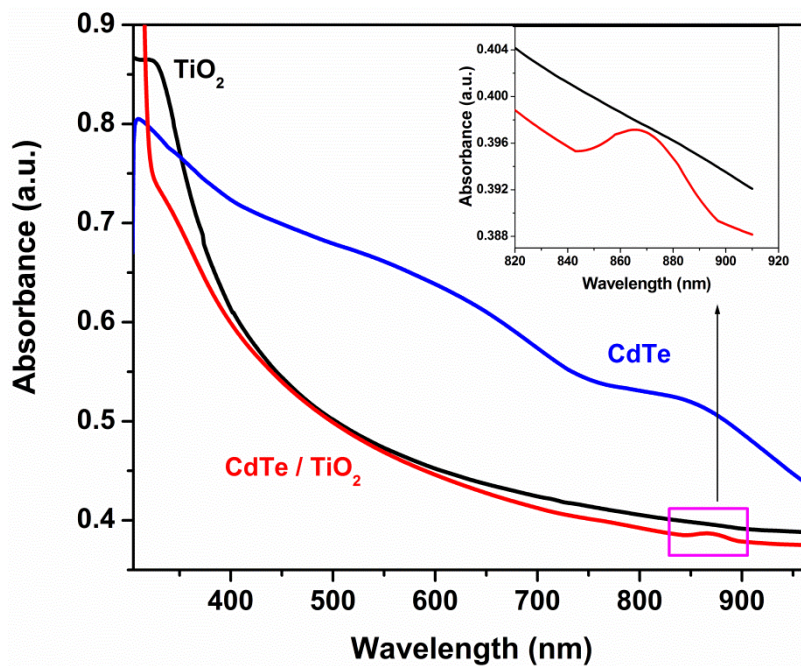

**Fig. S1.** UV Visible absorption spectra for  $\text{TiO}_2$ , CdTe, and  $\text{TiO}_2$ -CdTe matrices.

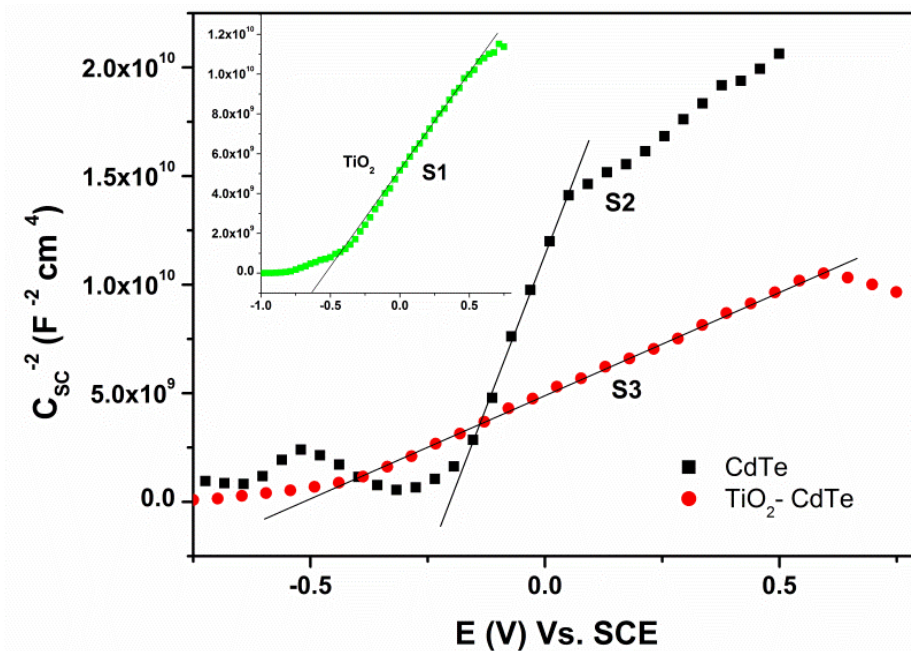

**Fig. S2.** Mott-Schottky plots of CdTe and  $\text{TiO}_2$ -CdTe/  $\text{I}^-$  -  $\text{I}_3^-$ / Pt system, (Inset : Mott-Schottky plot of  $\text{TiO}_2$ /  $\text{I}^-$  -  $\text{I}_3^-$ / Pt system).

The experimental work have determined the nature (carrier type) of the SCs and found each of the matrices TiO<sub>2</sub> (wide band gap), CdTe (low band gap) and the TiO<sub>2</sub>-CdTe hybrid structure, belonging to the n type category and hence could be used as the DSSC anode components. The nature of the matrices were determined by the capacitance-voltage experiment as demonstrated below and relevant information were obtained using Mott-Schottky relation as reported in many of the earlier work [J. Datta, A. Jana, C. Bhattacharya and S. Bandyopadhyay, *Electrochim. Acta*, 2009, 54, 5470–5478], [M. C. K. Sellers and E. G. Seebauer, *Thin Solid Films*, 2011, 519, 2103–2110], [R. V. D. Krol, A. Goosens, and J. Schoonman, *J. Electrochem. Soc.*, 1997, 144, 1723-1727].

$$\frac{1}{C^2} = \frac{2}{q\epsilon\epsilon_0 N_D} \left[ V - V_{FB} - \left( \frac{KT}{q} \right) \right]$$

**Fig. S2** with the inset demonstrates the Mott-Schottky plots at a frequency 1 kHz using three electrode assembly cell consisting of the respective SC matrices as working electrodes, saturated calomel as reference electrode and Pt counter electrode in 0.05 M iodine-iodide solution as working electrolyte used for the DSSCs. The plots in **Fig. S2** exhibited positive slopes (S1, S2 and S3) for each of the matrices confirming n type semiconductor.

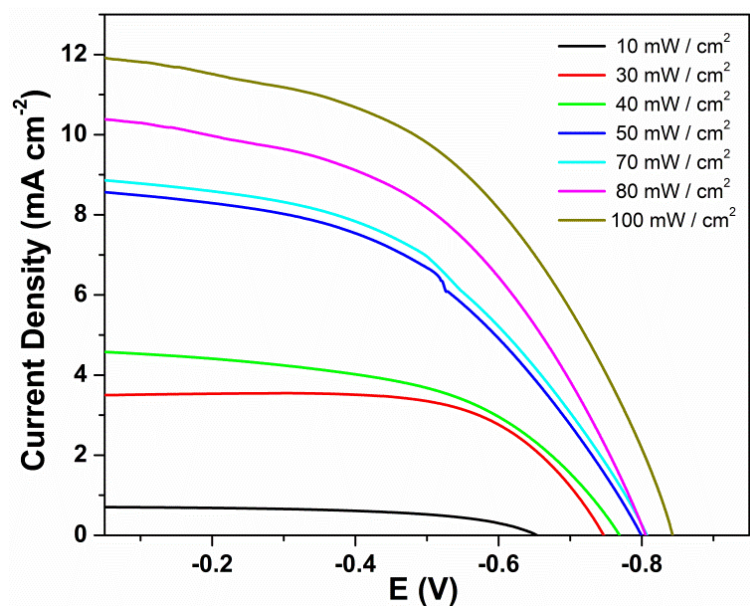

**Fig. S3.** Intensity variation of light illumination in *J-V* plot for TiO<sub>2</sub>-N3 fabricated DSSC.

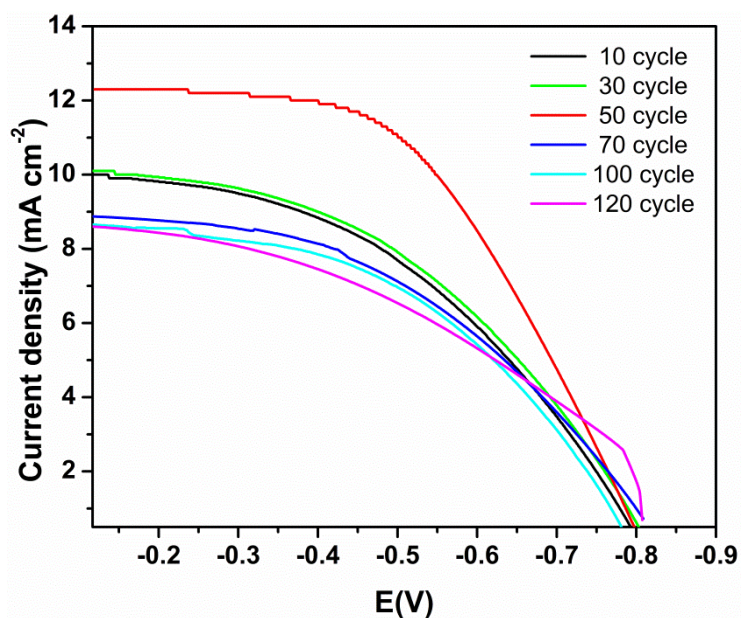

**Fig. S4.** *J-V* plot for the CdTe deposited under various scan in TiO<sub>2</sub> – CdTe -N3 fabricated DSSC under 50 mW cm<sup>-2</sup> light intensity

**Table S1.** *J-V* parameters recorded for TiO<sub>2</sub>-CdTe-N3 fabricated DSSC at different cycles in cyclic voltammetric process for deposition of CdTe over TiO<sub>2</sub> and bare TiO<sub>2</sub>-N3 system.

| Anode matrix                | $J_{sc}$ (mA cm <sup>-2</sup> ) | $\eta$ % | $V_{oc}$ (V) | FF (%) |
|-----------------------------|---------------------------------|----------|--------------|--------|
| TiO <sub>2</sub> -CdTe(10)  | 10.1                            | 7.7      | 0.80         | 47.38  |
| TiO <sub>2</sub> -CdTe(30)  | 10.2                            | 7.92     | 0.81         | 47.5   |
| TiO <sub>2</sub> -CdTe(50)  | 12.30                           | 11.10    | 0.80         | 55.70  |
| TiO <sub>2</sub> -CdTe(70)  | 8.91                            | 7.14     | 0.80         | 49.57  |
| TiO <sub>2</sub> -CdTe(100) | 8.78                            | 6.99     | 0.79         | 50.2   |
| TiO <sub>2</sub> -CdTe(120) | 8.69                            | 6.57     | 0.80         | 47.08  |
| TiO <sub>2</sub>            | 8.63                            | 6.69     | 0.79         | 48.53  |

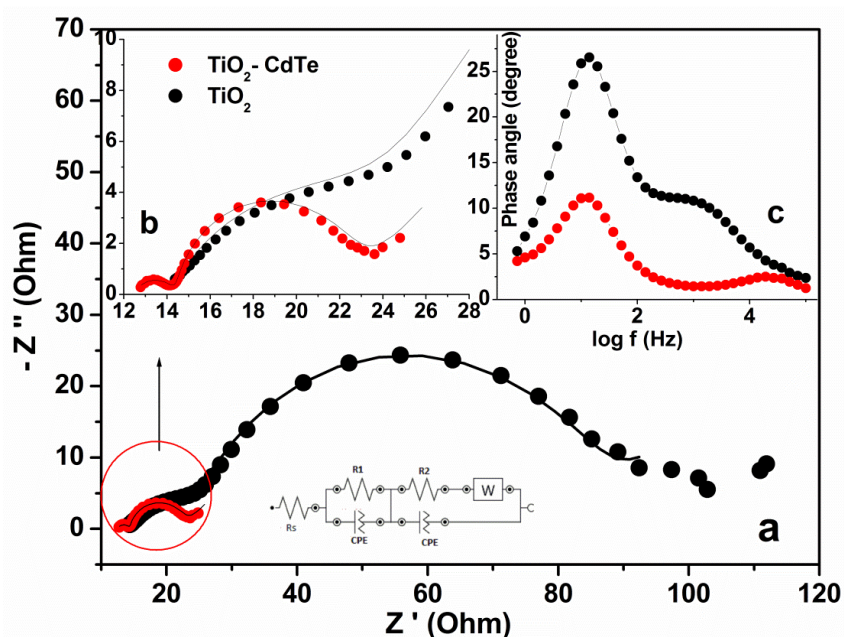

**Fig. S5.** (a) Nyquist diagram with fitted equivalent circuit for TiO<sub>2</sub> and TiO<sub>2</sub> – CdTe (50cycle)-N3 fabricated DSSC (Inset b: Magnified view of Nyquist diagram at high frequency region), (Inset c: Bode phase shift plot for the respective cells).

**Table S2.** EIS parameters obtained from equivalent circuit fitted Nyquist plots

|                                | $R_S$ ( $\Omega$ ) | $R_{CE}$ ( $\Omega$ ) | $R_{CT}$ ( $\Omega$ ) | CPE1(mMho) | CPE2(mMho) |
|--------------------------------|--------------------|-----------------------|-----------------------|------------|------------|
| <b>TiO<sub>2</sub>-N3</b>      | 14.1               | 13.3                  | 61.1                  | 0.414      | 0.586      |
| <b>TiO<sub>2</sub>-CdTe-N3</b> | 12.4               | 1.97                  | 8.30                  | 0.303      | 3.06       |

It is to be noted that there is only 10 mV positive shift of  $V_{OC}$  for CdTe modified system with respect to the bare TiO<sub>2</sub>. Although the change is not very significant, huge difference in polarization resistance is obtained from the Nyquist plots as derived from the impedance spectra.  $R_p$  for TiO<sub>2</sub>-N3 is 70.47  $\Omega$  while that for TiO<sub>2</sub>-CdTe-N3 is only 9.91 $\Omega$  which indicate that the oxidative charge transfer process at the DSSC anode, requires much less threshold energy for the TiO<sub>2</sub>-CdTe structure compared to TiO<sub>2</sub> alone. A number of reports are available which have demonstrated that with increase in  $V_{OC}$  there is considerable reduction in polarization or charge transfer resistances [**J. Datta, A. Jana, C. Bhattacharya and S. Bandyopadhyay, *Electrochim. Acta*, 2009, 54, 5470–5478**], [**N. Yang, J. Zhai, D. Wang, Y. Chen and L. Jiang, *ACS Nano*, 2010, 4, 887–894**].

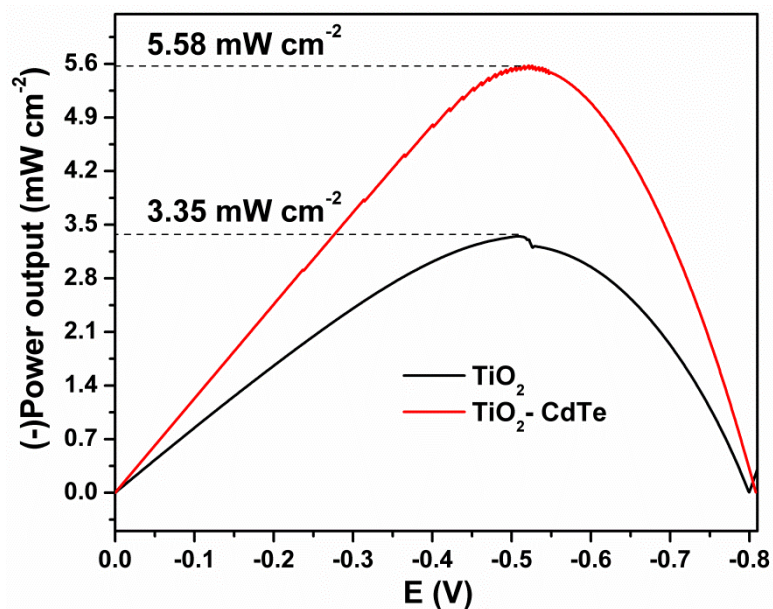

**Fig. S6.** Power output plot derived from  $J$ - $V$  analysis of  $\text{TiO}_2$  and  $\text{TiO}_2\text{-CdTe}$  matrix fabricated DSSC using N3 dye at  $50 \text{ mW cm}^{-2}$ .

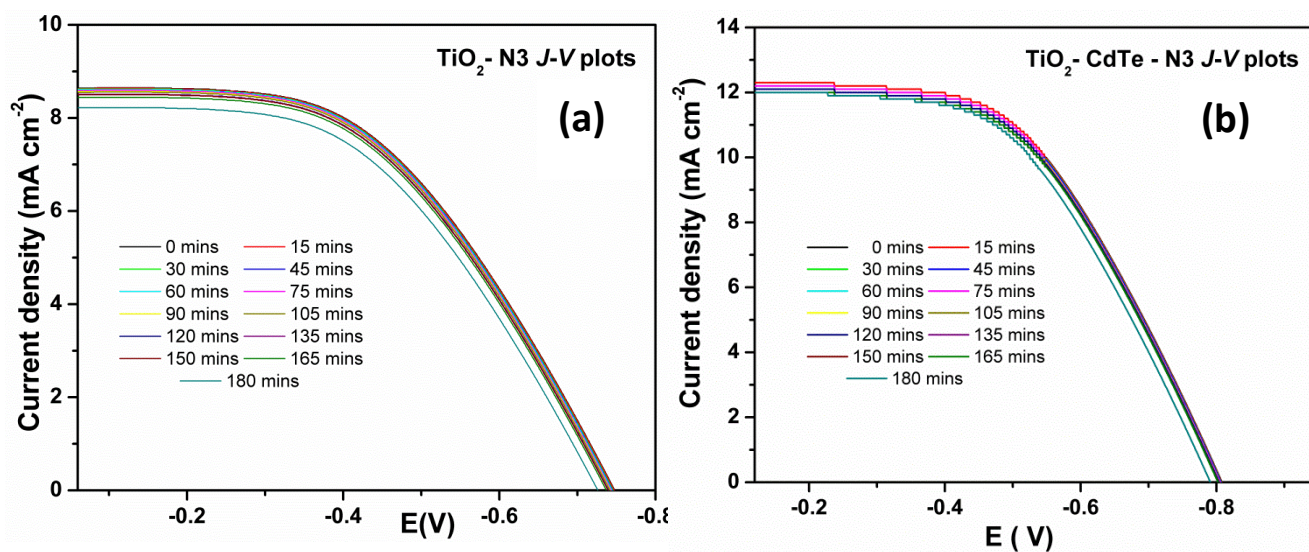

**Fig. S7.** (a)  $J$ - $V$  plot of  $\text{TiO}_2$  - N3 based DSSC under  $50 \text{ mW cm}^{-2}$  for 3 hours with 15

minutes time interval and (b) *J-V* plot of TiO<sub>2</sub>-CdTe-N3 based DSSC under 50 mW cm<sup>-2</sup> for 3 hours with 15 minutes time interval.

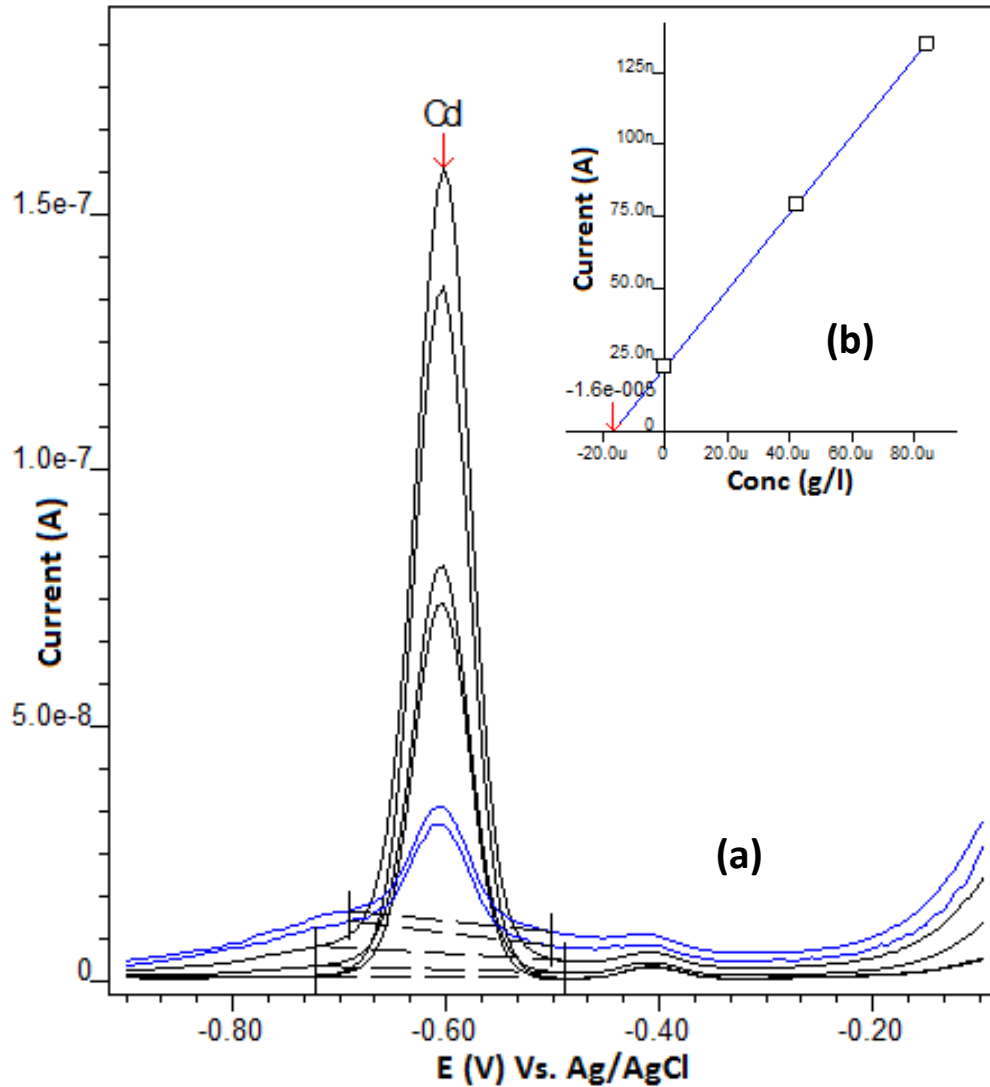

**Fig. S8.** (a) Anodic stripping voltammogram of Cd of TiO<sub>2</sub>-CdTe (30cycle) matrix.(b) Current Vs. Concentration (ppm) of CdTe (30cycle) coated TiO<sub>2</sub> matrix in NaClO<sub>4</sub> aqueous electrolyte following potentiodynamic polarization study.



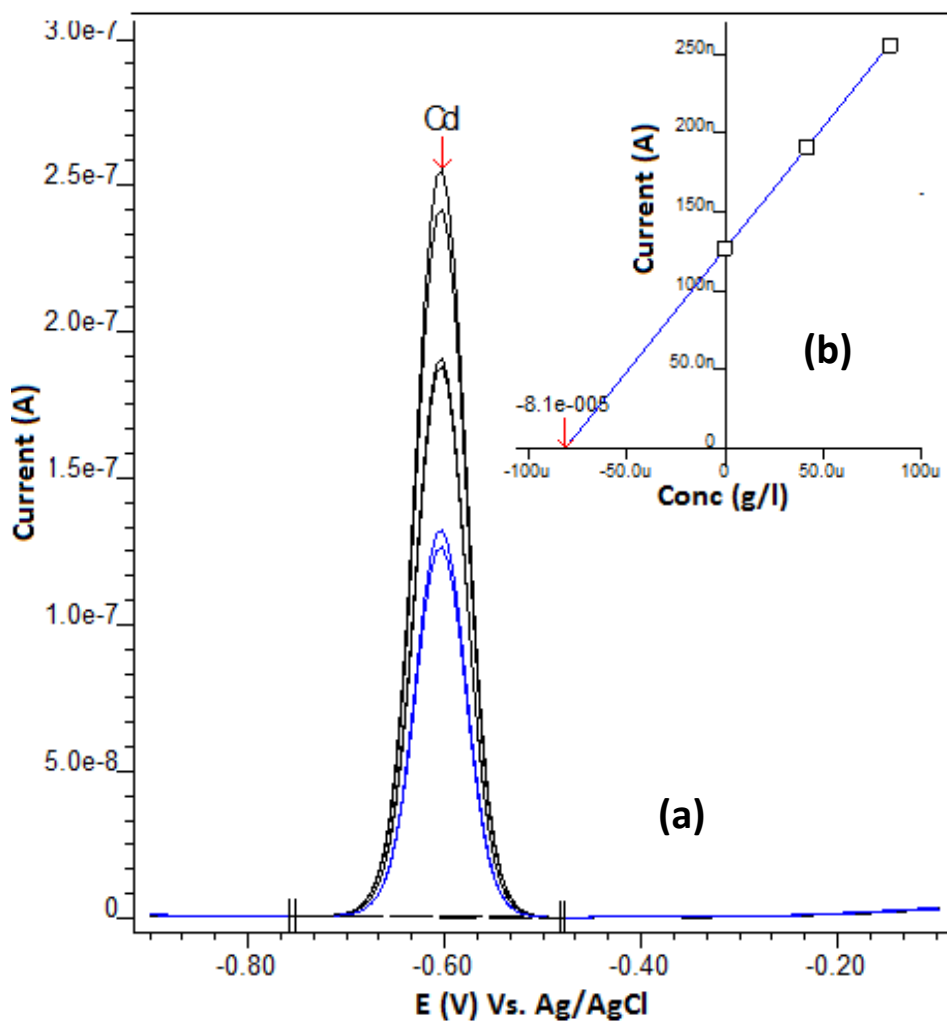

**Fig. S9.** (a) Anodic stripping voltammogram of Cd of TiO<sub>2</sub>-CdTe (70cycle) matrix.(b) Current Vs. Concentration (ppm) of CdTe (70cycle) coated TiO<sub>2</sub> matrix in NaClO<sub>4</sub> aqueous electrolyte following potentiodynamic polarization study.

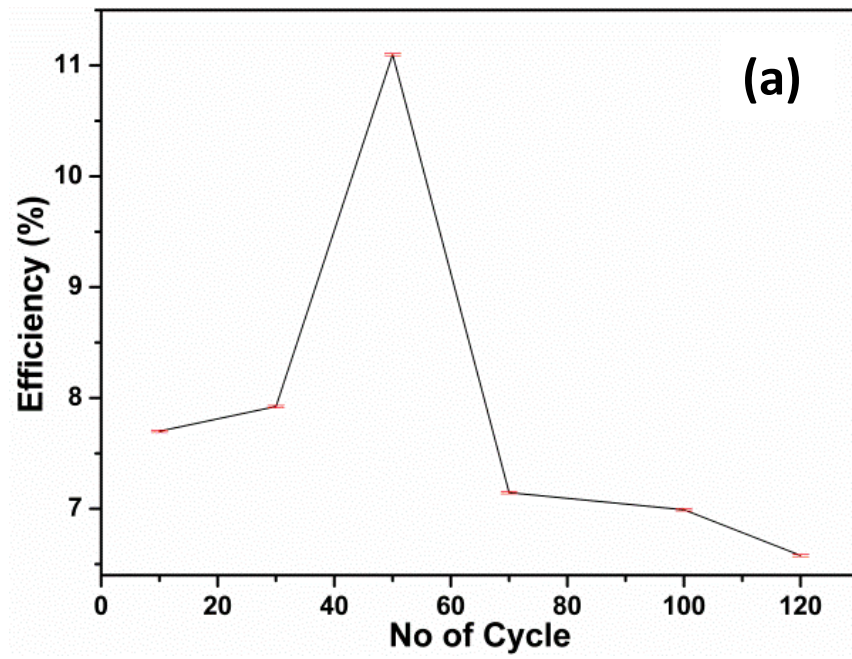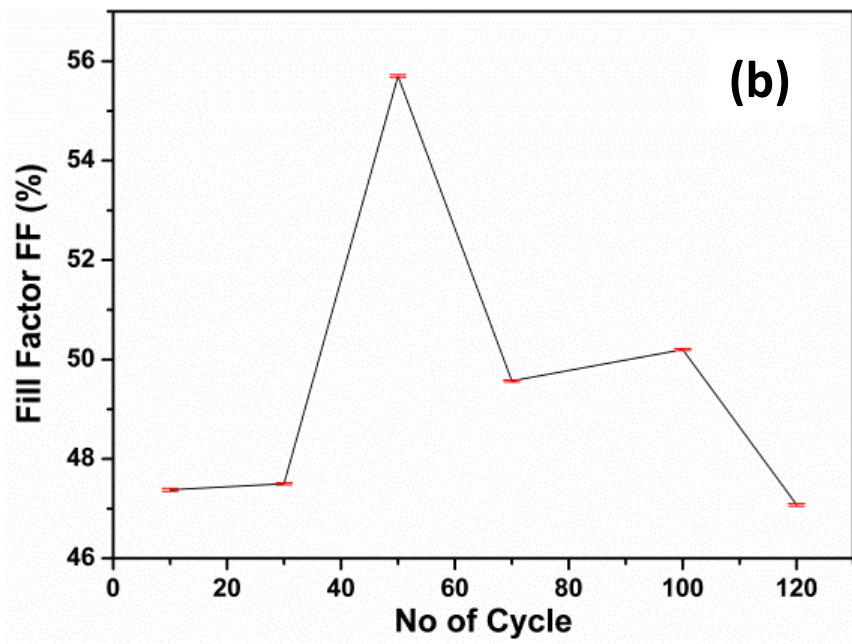

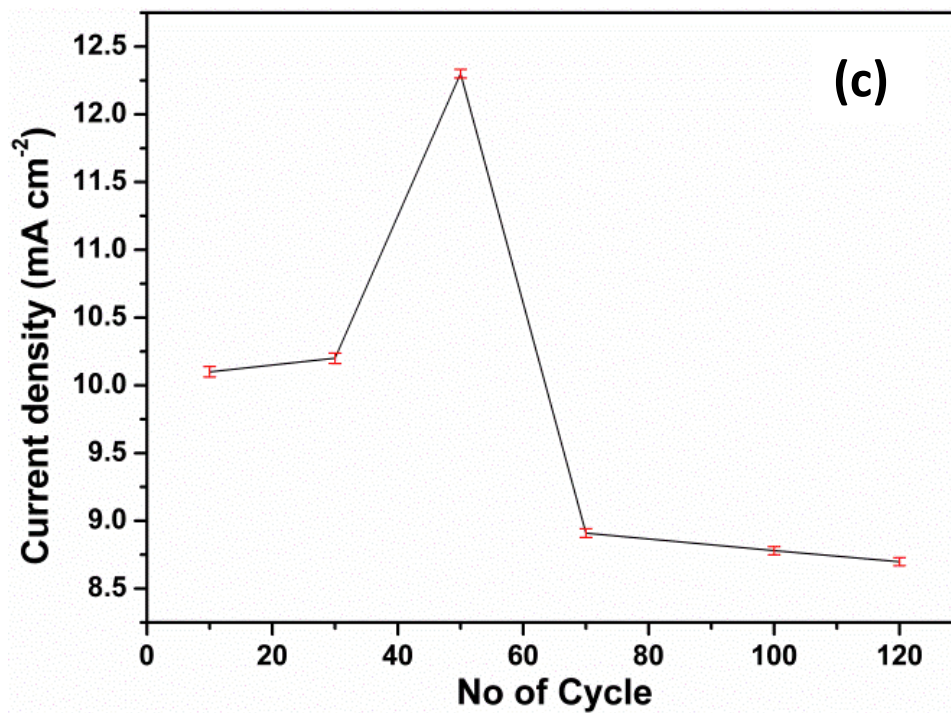

**Fig. S10.** Periodic Cycles vs. (a) Efficiency (b) fill factor FF% and (c) short circuit current density  $J_{sc}$ , values derived for the DSSC showing mean deviation from four experimental results.
